# Supplementary material
Source: PubMed Central journal article supplement (PMC5505342)

BT549

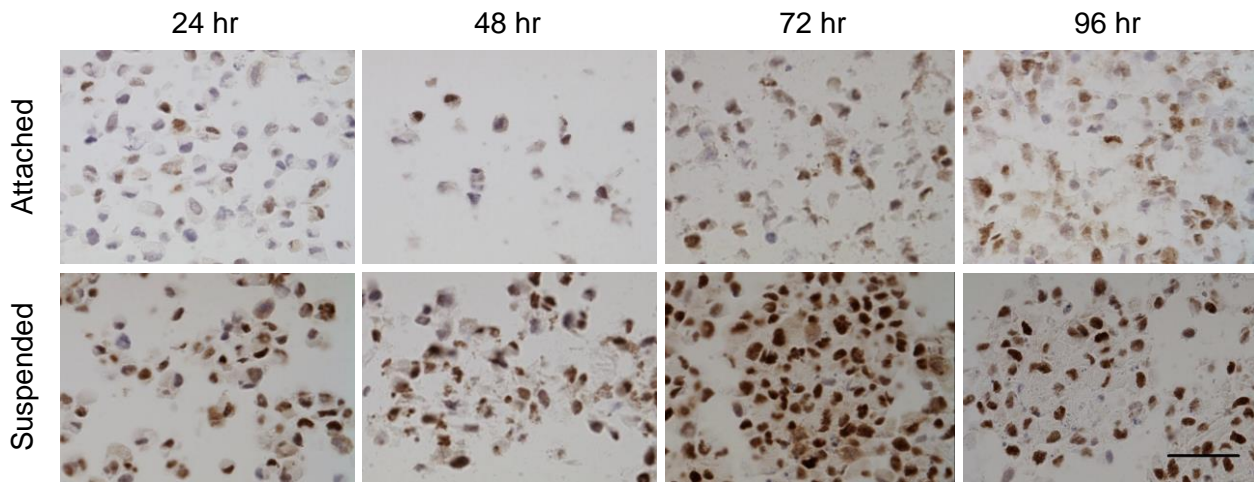

Supplement: NIHMS872648-supplement-1.pdf [file NIHMS872648-supplement-1.pdf]

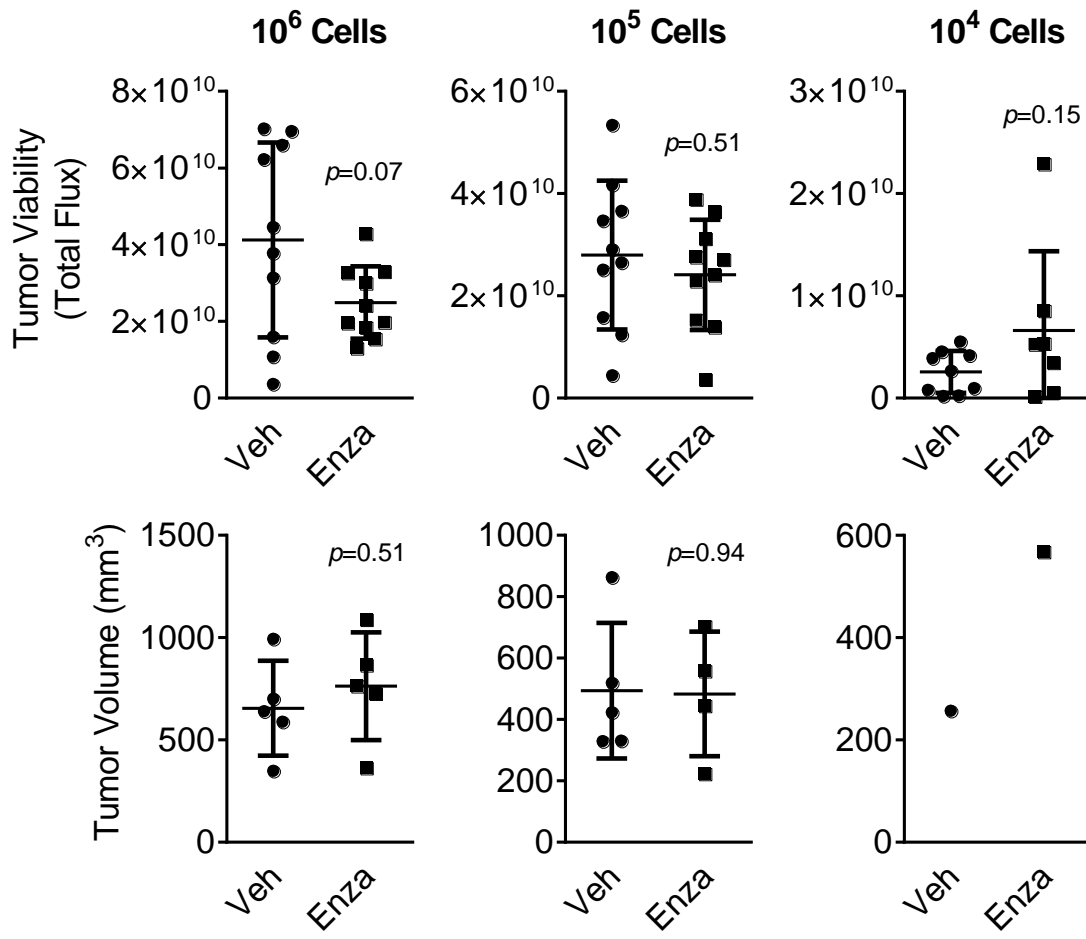

Supplement: NIHMS872648-supplement-2.pdf [file NIHMS872648-supplement-2.pdf]

**A**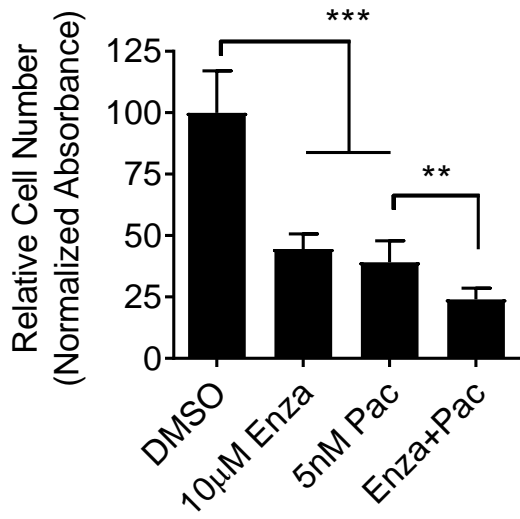**B**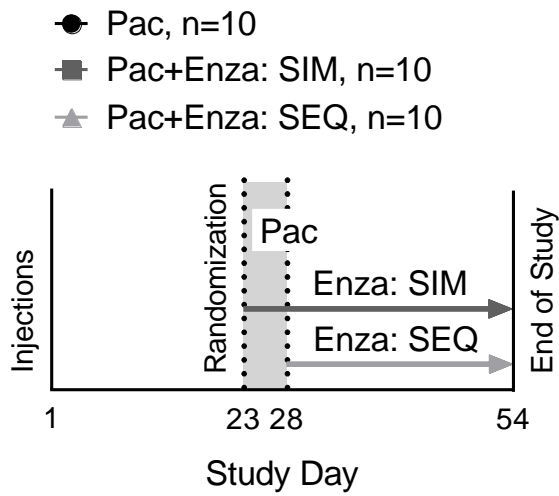**C**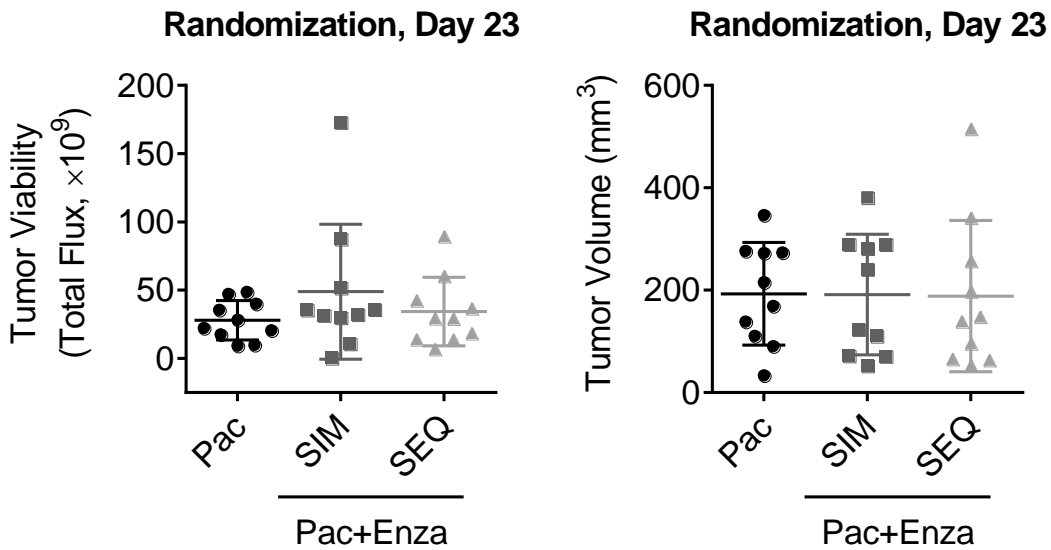

Supplement: NIHMS872648-supplement-3.pdf [file NIHMS872648-supplement-3.pdf]
